# Supplementary material for: MiR-34a/c-Dependent PDGFR-α/β Downregulation Inhibits Tumorigenesis and Enhances TRAIL-Induced Apoptosis in Lung Cancer
Source: PLOS journal article supplement (doi:10.1371/journal.pone.0067581), 2013-06-21
Supplement: S1 (10.1371/journal.pone.0067581.s001) [file journal.pone.0067581.s001]

**a**

| Cell lines | P53 status |
|------------|------------|
| H1299      | null       |
| A549       | WT         |
| Calu-6     | null       |
| H1703      | mutated    |
| H460       | WT         |

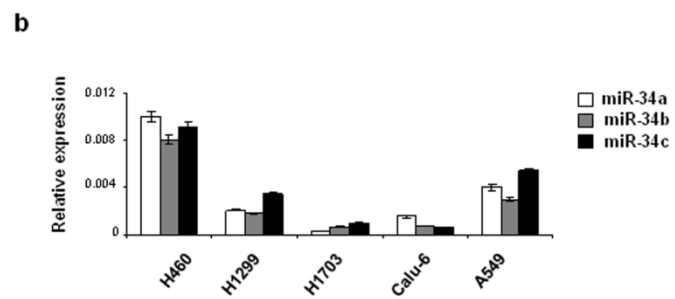

**Figure S1**

**miR-34a and PDGFR alpha co-expression analyses**

| miR34+/PDGFR $\alpha$ + | PDGFR $\alpha$ -/miR-34a+ | PDGFR $\alpha$ +/miR-34a- | Each negative |
|-------------------------|---------------------------|---------------------------|---------------|
| 9/106 (8%)              | 9/106 (8%)                | 40/106 (38%)              | 48/106 (46%)  |

**miR-34a and PDGFR beta co-expression analyses**

| miR34+/PDGFR $\beta$ + | PDGFR $\beta$ -/miR-34a+ | PDGFR $\beta$ +/miR-34a- | Each negative |
|------------------------|--------------------------|--------------------------|---------------|
| 9/107 (8%)             | 10/107 (9%)              | 34/107 (32%)             | 54/107 (51%)  |

**Figure S2**

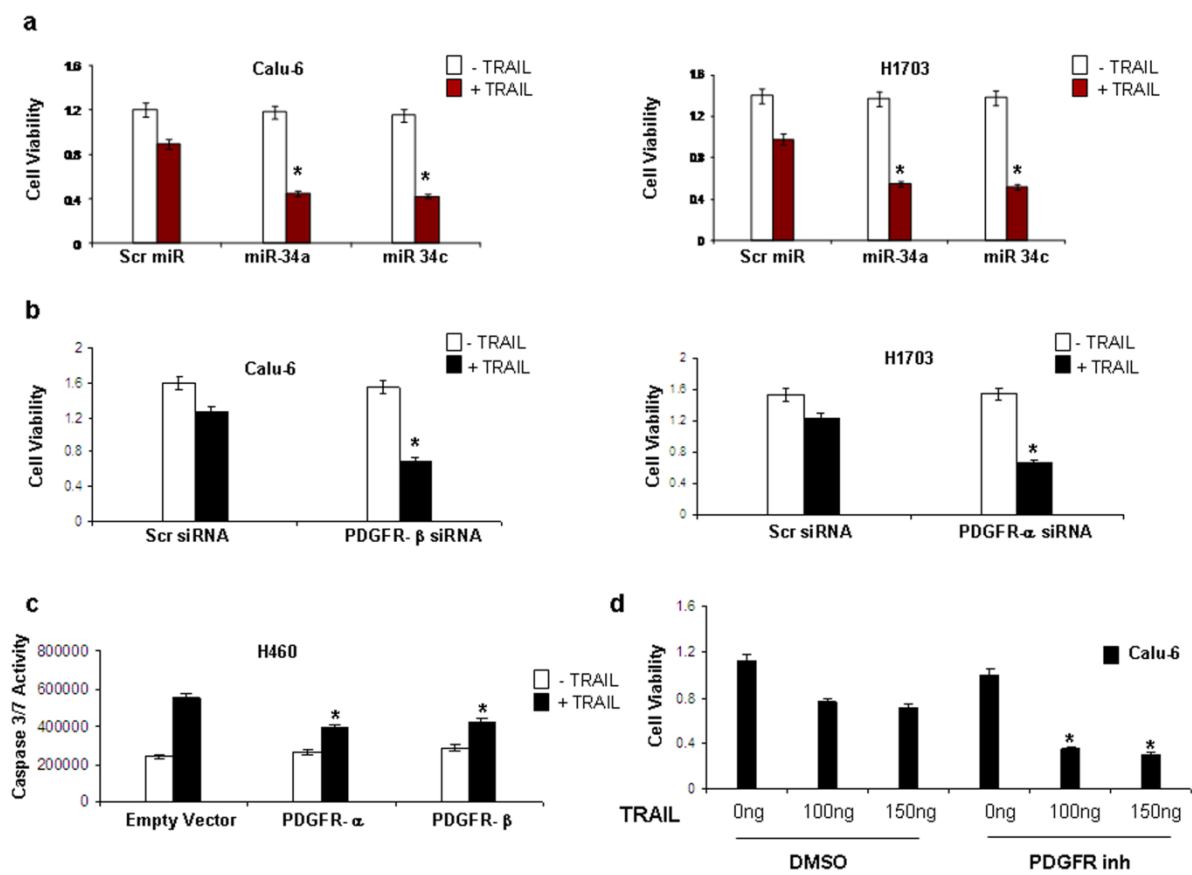

**Figure S3**

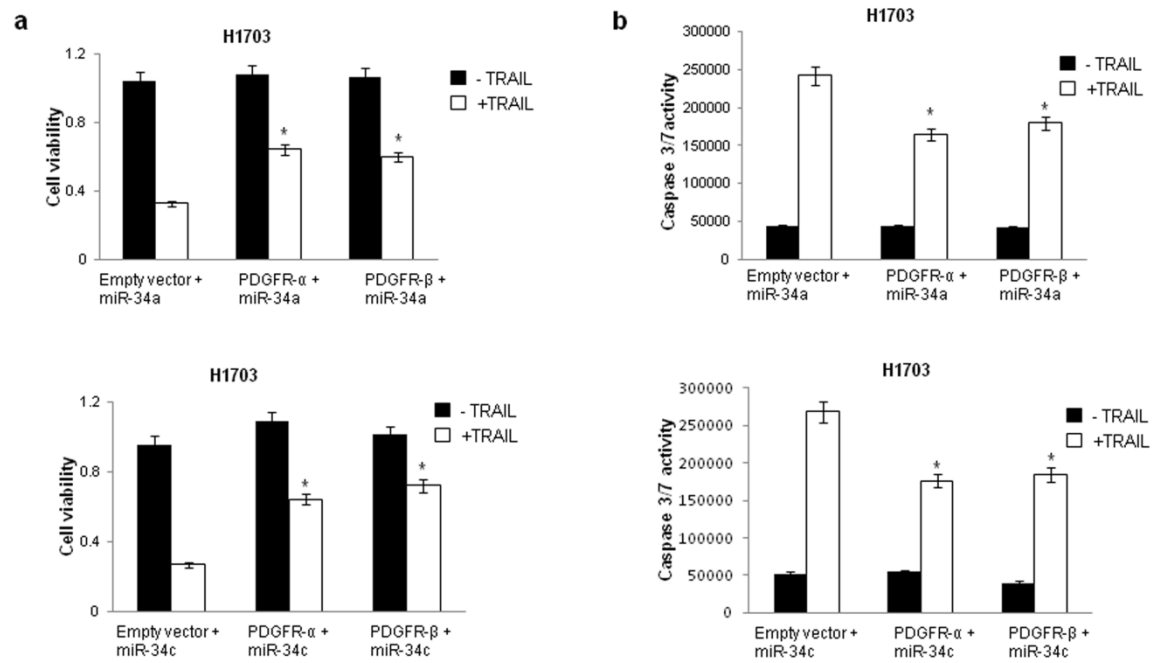

**Figure S4**
